# Supplementary material for: Highly monodispersed Ag embedded SiO2nanostructured thin film for sensitive SERS substrate: growth, characterization and detection of dye molecules
Source: Royal Society of Chemistry journal article supplement (doi:10.1039/c5ra04355g), 2015-01-01
Supplement: c5ra04355g1.pdf [file c5ra04355g1.pdf]

### Supporting Information

#### Highly monodispersed Ag embedded SiO<sub>2</sub> nanostructured thin film for Sensitive SERS substrate: Growth, characterization and Detection of dye molecules

Naidu Dhanpal Jayram<sup>a</sup>, S. Sonia<sup>a</sup>, P. Suresh Kumar<sup>b</sup>, L. Marimuthu<sup>a</sup>, Yoshitake Masuda<sup>d</sup>, D. Mangalaraj<sup>a\*</sup>, N. Ponpandian<sup>a</sup>, C. Viswanathan<sup>a</sup>, Seeram Ramakrishna<sup>c</sup>

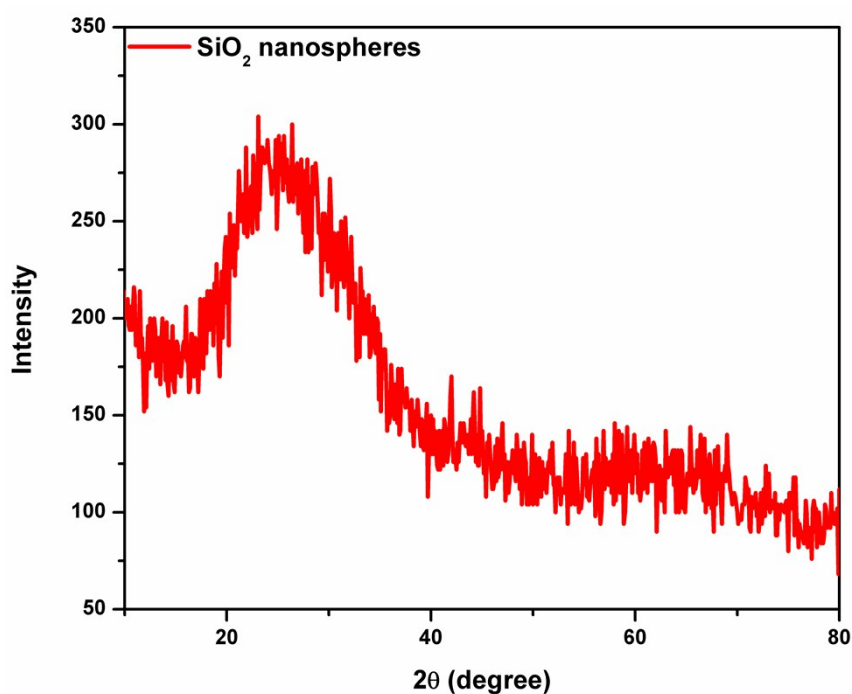

**Fig.S1.** XRD pattern of SiO<sub>2</sub> nanospheres

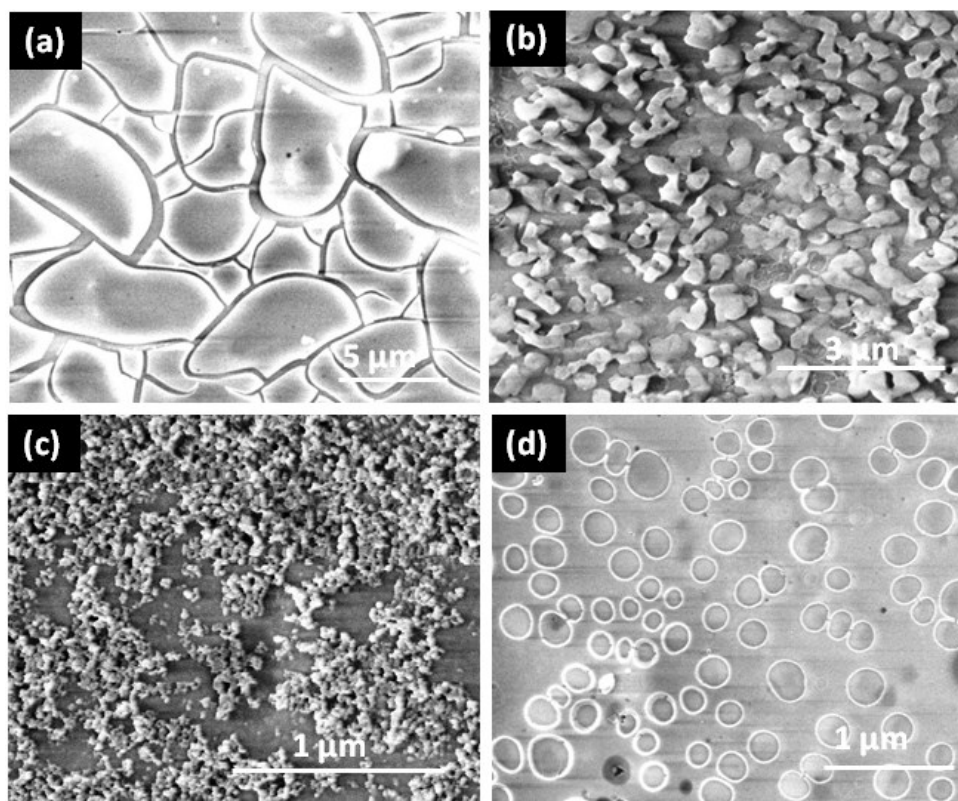

**Fig. S2** Growth process of SiO<sub>2</sub> nanospheres a) absence of water b) 5 ml H<sub>2</sub>O+pH 6  
c) 5 ml H<sub>2</sub>O +pH 7 d) 10 ml H<sub>2</sub>O +pH8

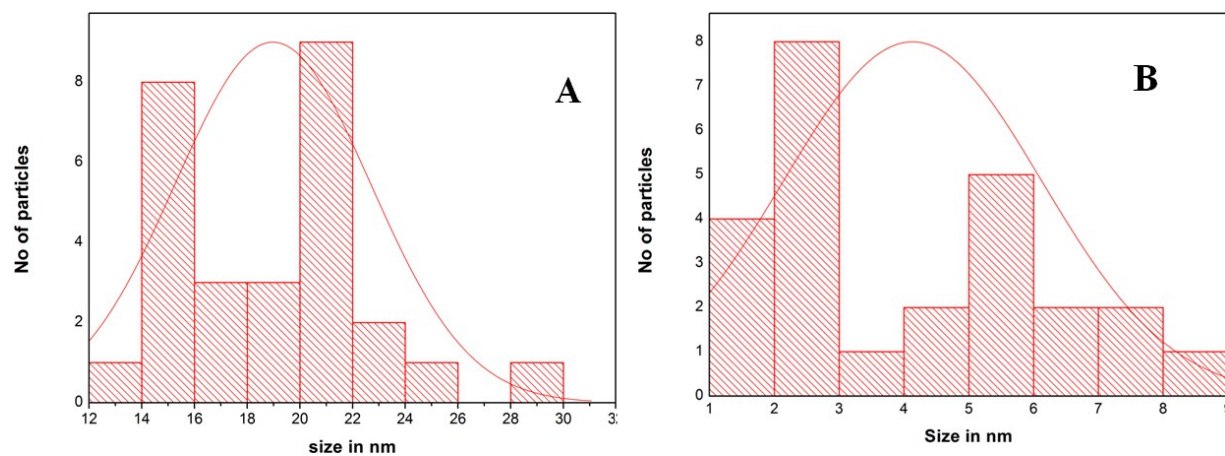

**Fig. S3. Particle size distribution for A) Silver hydrosol A (19nm) B) Silver hydrosol B (5nm)**

The quantitative size distribution for normal curve fit shows sizes of silver hydrosol A and B.

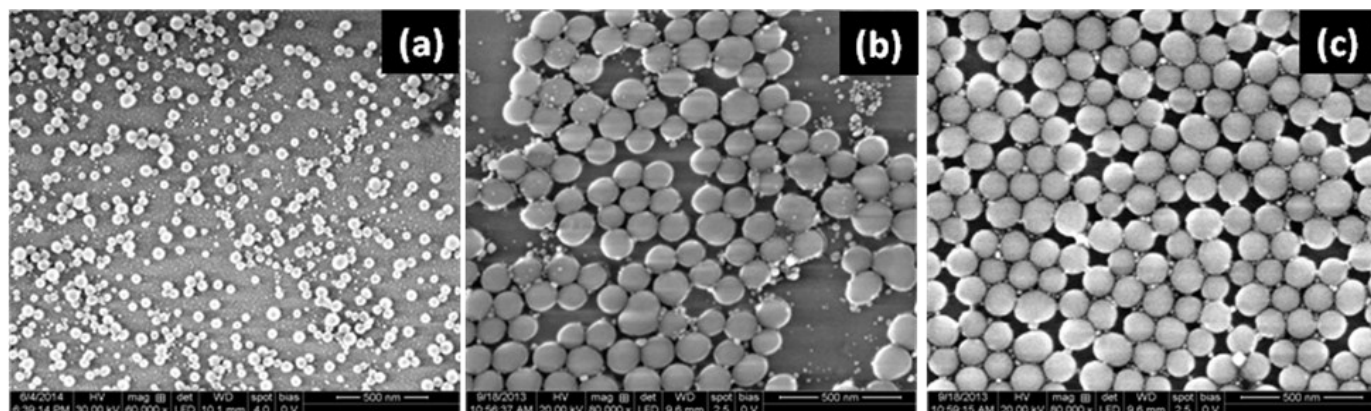

**Fig. S4.** Silver (HydrosolA) coated silica nanospheres by varying silica size a) 50 nm b) 100 nm and c) 130 nm

**As the size of Silica nanospheres increases the gap and hot spot increases for SERS.**

Case 1: Distance between Silica and Silver is more than 70 nm

Case2: Distance between Silica and silver is between 25-30nm somewhere near to 15nm but monodispersity is less

Case3: Ag nanoparticles around 15 nm and nano gap between silica and silver about 20 nm

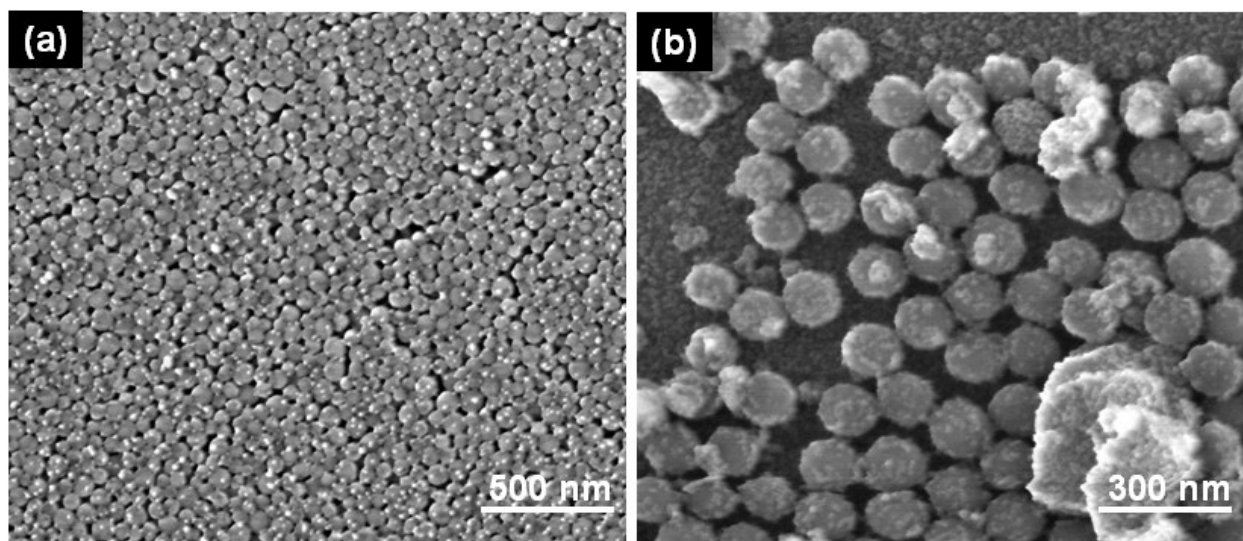

**Fig. S5.** Silver (hydrosol B) coated silica nanospheres

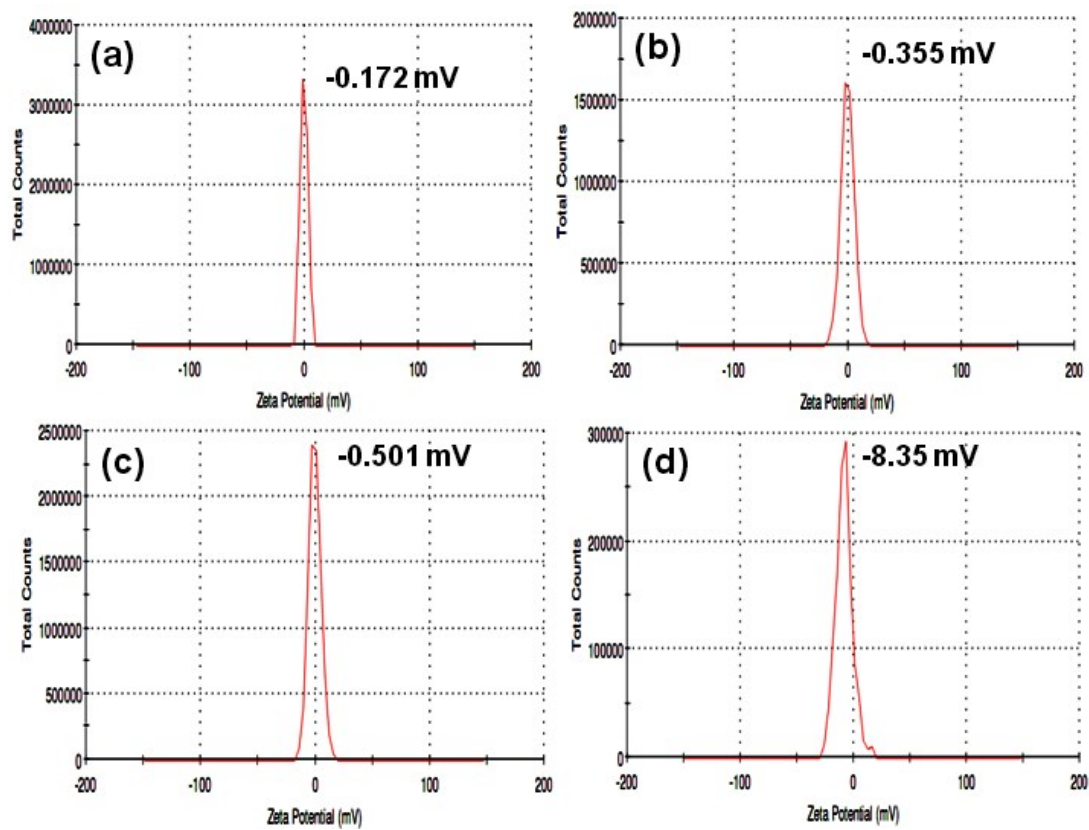

**Fig. S6.** Zeta potential of SiO<sub>2</sub> nanospheres prepared at a) pH 7 b) pH 8 c) pH 9 and d) pH 10.

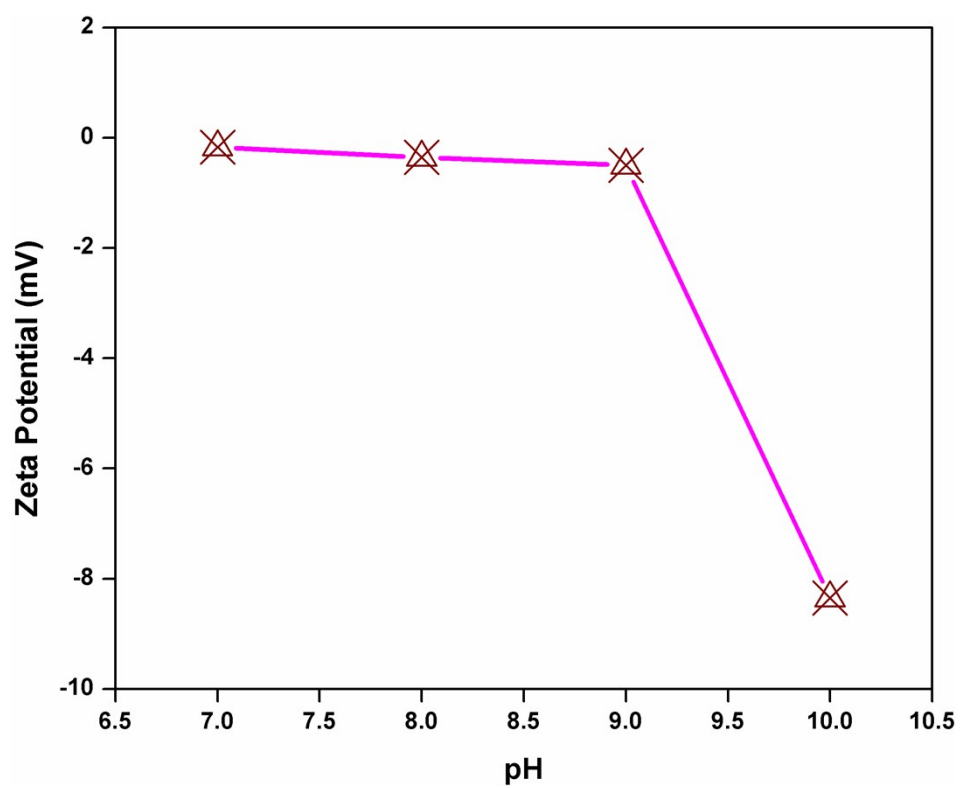

**Fig. S7.** Zeta potential variation of SiO<sub>2</sub> nanospheres

When the pH of SiO<sub>2</sub> increases zeta potential decreases and high negativity of silica spheres results in larger nanoparticles through faster nucleation.



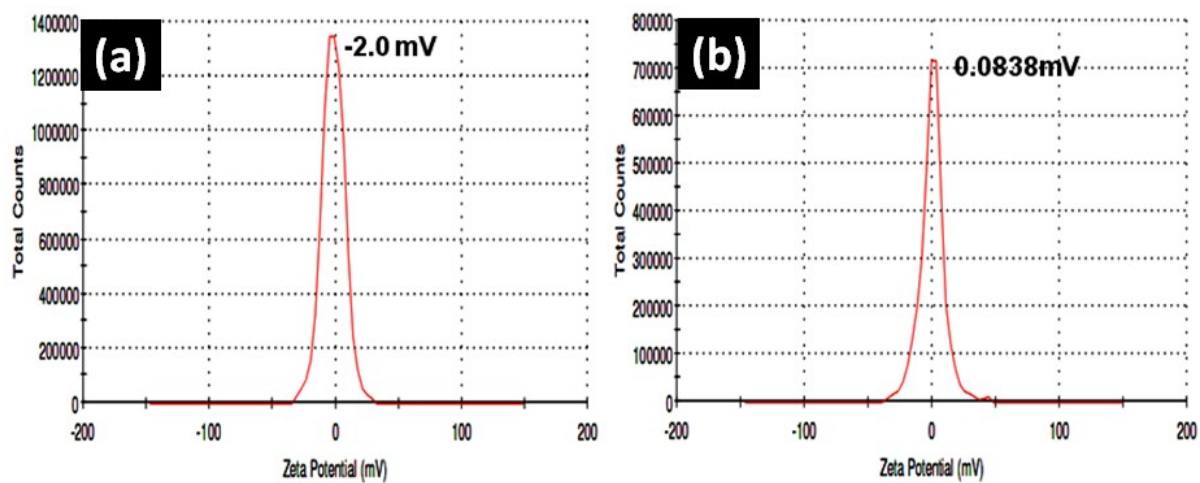

**Fig. S8.** Zeta potential of a) Ag hydrosol A b) Ag hydrosol B

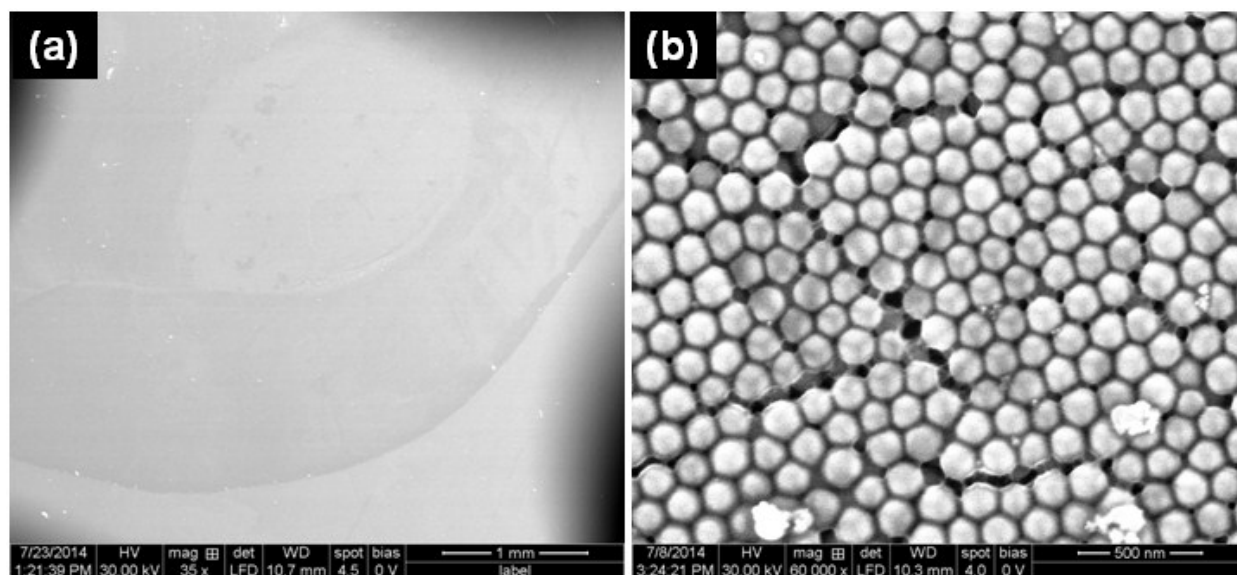

**Fig. S9.** FESEM images of silica nanospheres a) After putting Dye b) Magnified Image

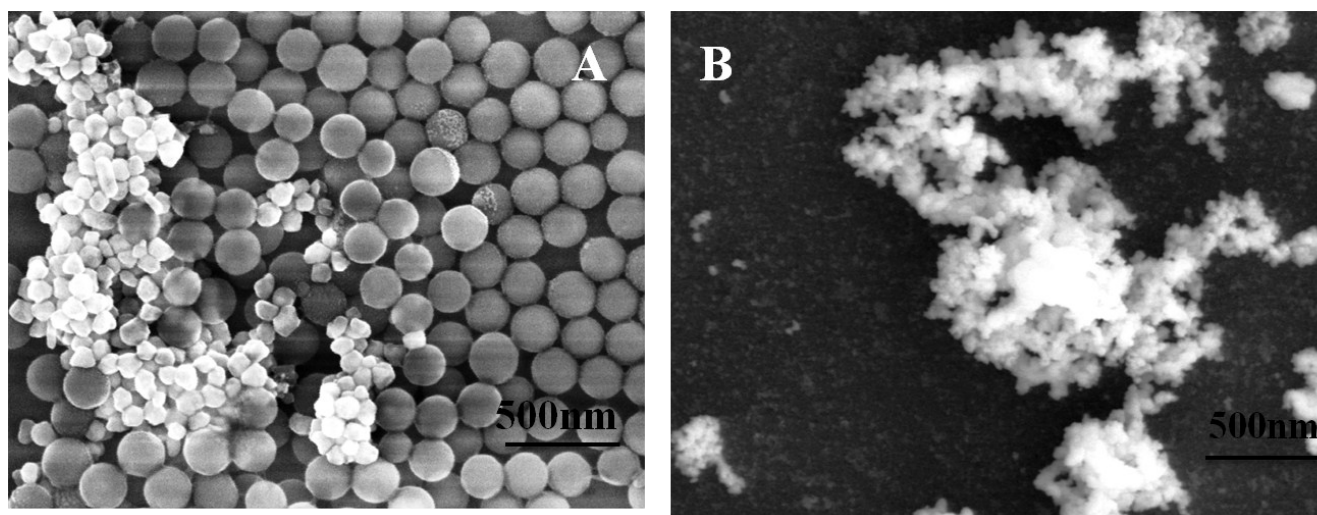

**Fig. S10. A) Ag nanoparticle of size 80 nm on Ag@SiO<sub>2</sub> nanospheres B) Silver (Hydrosol A) with PVP 1 molar.**

Fig 10 represents the bigger silver nanoparticles which can't adhere exactly in between the silica spheres and the agglomeration of silver spheres takes place. Moreover the probe molecule can't be fit tightly in between this nanogaps tends to less SERS.

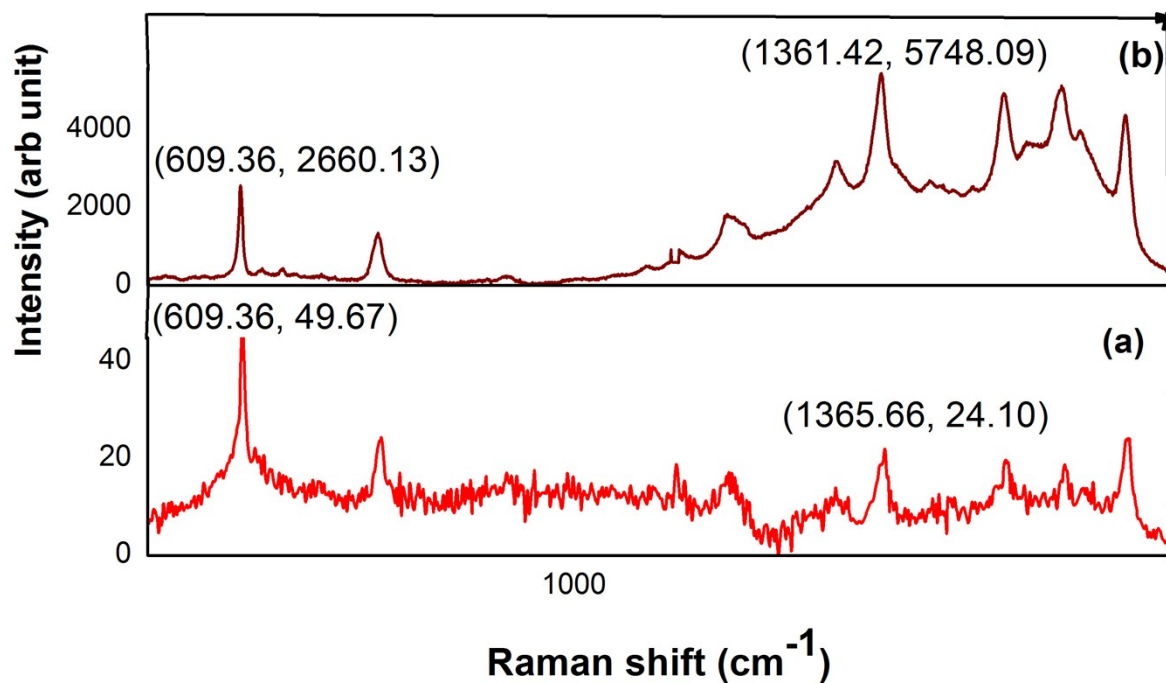

**Fig.11. a) Normal Raman spectra R6G 10<sup>-3</sup> and b) SERS spectra of R6G using 10<sup>-11</sup> molar for prepared thin films**

### Enhancement factor calculation

Where  $C_{\text{surf}}$  is the concentration of R6G solution for SERS,  $C_{\text{surf}}=10^{-11}$  M,  $v$  is the volume of R6G solution used for SERS detection,  $v=20 \mu\text{L}$ ,  $r$  is the radius of  $20 \mu\text{L}$  of R6G solution formed on the SERS substrate,  $r=4\text{mm}$ .

**From fig. 10**  $I_{\text{bulk}}$  ( $1365\text{cm}^{-1}$ ) and  $I_{\text{surf}}$  ( $1361 \text{ cm}^{-1}$ ) are 24.10 and 5748.09 cps, respectively.

Here Considering the incident laser power for normal Raman spectrum and SERS spectrum acquisition, are same. Hence  $I_{\text{surf}} / I_{\text{bulk}} = 5748.09 / 24.10$

Finally, the EF of this  $\text{Ag@SiO}_2$  SERS substrate can be  
Calculated as  $7.79 \times 10^8$
